# Supplementary material for: Use of a Calving Blind That Imitates a Natural Environment
Source: MDPI journal article supplement (doi:10.3390/ani14081171), 2024-04-13
Supplement: s1 [file s1]

Supplementary File S1. The number of agonistic bouts (head butt, chase, and displacement from a blind), allogrooming bouts, and allogrooming duration (s) for each cow included in the focal cow analysis during the 5 h prior to calving. The cow could have been the actor or receiver for each interaction summarized.

| Cow ID | Agonistic bouts | Allogrooming bouts | Allogrooming duration (s) |
|--------|-----------------|--------------------|---------------------------|
| 1240   | 2               | 0                  |                           |
| 1251   | 9               | 0                  |                           |
| 1272   | 0               | 1                  | 23                        |
| 1339   | 3               | 0                  |                           |
| 1340   | 5               | 6                  | 252                       |
| 1347   | 3               | 0                  |                           |
| 1351   | 4               | 0                  |                           |
| 1354   | 2               | 0                  |                           |
| 1357   | 7               | 0                  |                           |
| 1367   | 17              | 0                  |                           |
| 1391   | 21              | 0                  |                           |
| 1400   | 11              | 0                  |                           |
| 1406   | 1               | 18                 | 794                       |
| 1414   | 8               | 0                  |                           |
| 1418   | 8               | 0                  |                           |
| 1422   | 19              | 0                  |                           |
| 1433   | 13              | 0                  |                           |
| 1442   | 9               | 0                  |                           |
| 1443   | 2               | 0                  |                           |
| 1446   | 4               | 1                  | 62                        |
| 1455   | 13              | 0                  |                           |
| 1457   | 5               | 0                  |                           |
| 1458   | 5               | 0                  |                           |
| 1459   | 11              | 0                  |                           |
| 1462   | 21              | 0                  |                           |
| 1463   | 12              | 0                  |                           |
| 1467   | 14              | 2                  | 89                        |
| 1469   | 5               | 2                  | 112                       |
| 1471   | 12              | 0                  |                           |
| 1477   | 1               | 0                  |                           |
