# Supplementary material for: Use of a Calving Blind That Imitates a Natural Environment
Source: MDPI journal article supplement (doi:10.3390/ani14081171), 2024-04-13
Supplement: s1 [file s1]

Supplementary File S2. The descriptive summary of the number of times a cow was observed in a blind during the 12 h before calving and the same 12 h period on day 7 prior to calving. Scan sampling was conducted to record if the cow was in or out of a blind every 10 min for a 12 h period. It is also defined if the cow gave birth in the blind.

| # of times a cow was observed in a blind<br>in a 12 h period |                    |                |                 |
|--------------------------------------------------------------|--------------------|----------------|-----------------|
| Cow ID                                                       | 7 d before calving | Day of calving | Calved in blind |
| 1240                                                         | 0                  | 9              | Yes             |
| 1251                                                         | 0                  | 43             | Yes             |
| 1272                                                         | 52                 | 23             | Yes             |
| 1339                                                         | 2                  | 2              | No              |
| 1340                                                         | 23                 | 27             | No              |
| 1347                                                         | 13                 | 20             | Yes             |
| 1351                                                         | 0                  | 10             | Yes             |
| 1354                                                         | 0                  | 0              | No              |
| 1357                                                         | 1                  | 20             | Yes             |
| 1367                                                         | 2                  | 35             | Yes             |
| 1391                                                         | 15                 | 15             | No              |
| 1400                                                         | 7                  | 29             | Yes             |
| 1406                                                         | 1                  | 0              | No              |
| 1414                                                         | 1                  | 12             | No              |
| 1418                                                         | 8                  | 54             | Yes             |
| 1422                                                         | 2                  | 11             | No              |
| 1433                                                         | 12                 | 35             | Yes             |
| 1442                                                         | 8                  | 2              | No              |
| 1443                                                         | 8                  | 11             | No              |
| 1446                                                         | 38                 | 22             | Yes             |
| 1455                                                         | 0                  | 16             | No              |
| 1457                                                         | 21                 | 23             | Yes             |
| 1458                                                         | 3                  | 6              | Yes             |
| 1459                                                         | 0                  | 12             | Yes             |
| 1462                                                         | 0                  | 5              | No              |
| 1463                                                         | 0                  | 7              | No              |
| 1467                                                         | 0                  | 3              | No              |
| 1468                                                         | 0                  | 11             | Yes             |
| 1469                                                         | 12                 | 8              | No              |
| 1471                                                         | 0                  | 11             | No              |
| 1477                                                         | 13                 | 31             | No              |
